# Supplementary material
Source: PubMed Central journal article supplement (PMC3799875)
Supplement: NIHMS425434-supplement-2.pdf [file NIHMS425434-supplement-2.pdf]

**Supplementary information**

**Potential for Interdependent Development of tRNA Determinants for  
Aminoacylation and Ribosome Decoding**

**Cuiping Liu, Howard Gamper, Hanqing Liu, Barry S. Cooperman, and Ya-Ming Hou**

Supplementary Figure S1 (Hou)

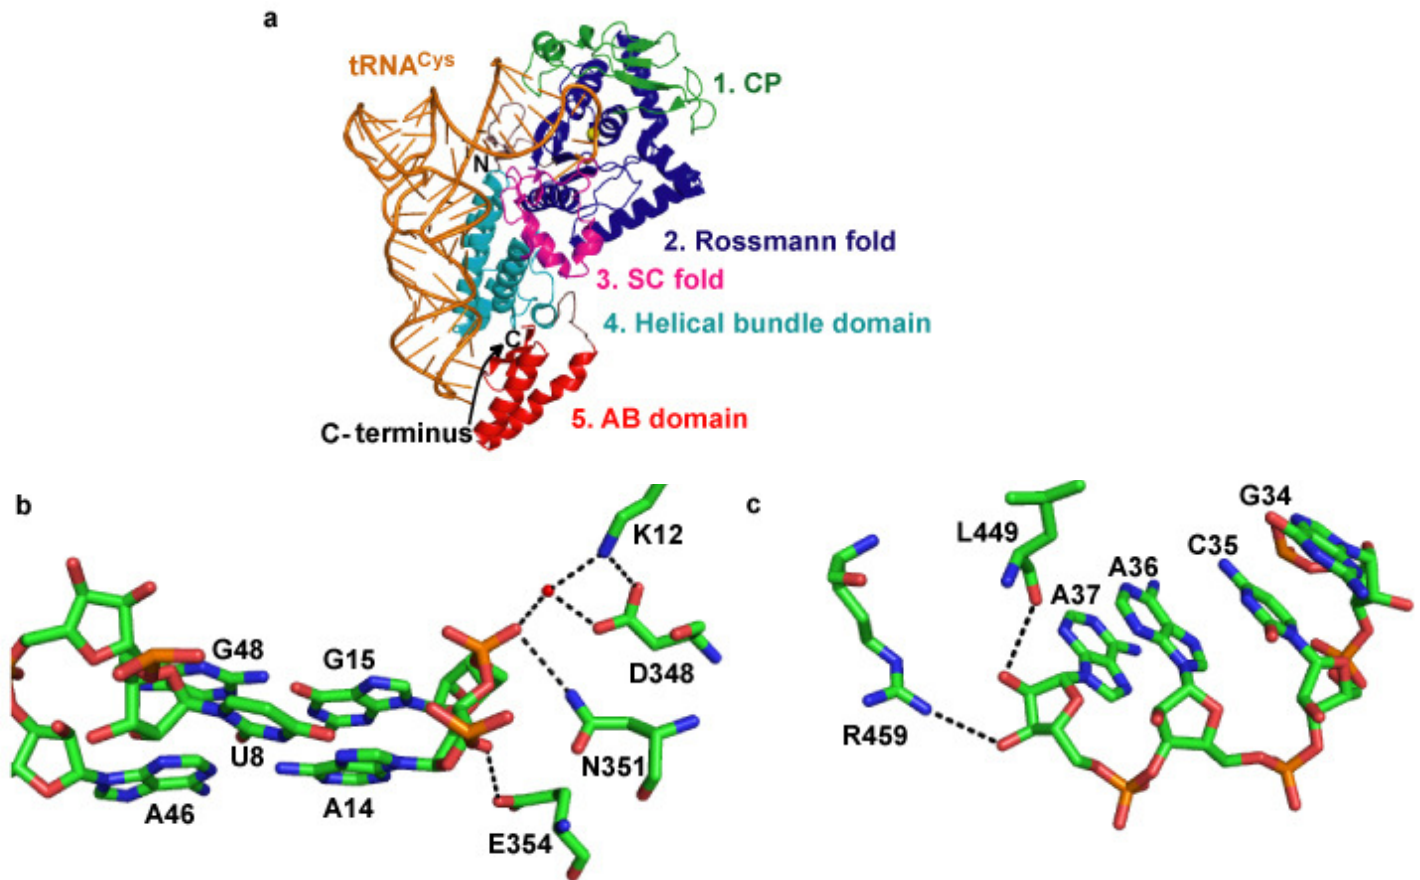

**Supplementary Figure S1. Indirect readout of etRNA<sup>Cys</sup> by eCysRS.** (a) The crystal structure of eCysRS-etRNA<sup>Cys</sup> complex, showing the enzyme core domains: 1, the connective polypeptide (CP); 2, Rossmann fold; 3, the stem-contact (SC) fold; 4, the helical bundle domain; and 5, the anticodon-binding (AB) domain. The C-terminus of eCysRS is localized between the helical bundle and AB domains, shown by the bent arrow, which in hCysRS is extended with the CTE. (b) Recognition of G15-G48 by eCysRS through hydrogen-bonding interactions between N351 and the 5' phosphate of G15 and between E354 and 2'-OH of A14. A water molecule that coordinates the network of hydrogen bonds is shown as a red sphere. (c) Recognition of A37 by eCysRS through hydrogen-bonding interactions between the 2'- and 3'-OH of A37 with L449 and R459, respectively. The enzyme residues involved in both types of indirect readout interactions are not conserved between eCysRS and hCysRS. The figures were drawn based on the structure of the eCysRS-tRNA complex<sup>18</sup> (PDB code 1U0B) and were made using PyMoL.

Supplementary Figure S2 (Hou)

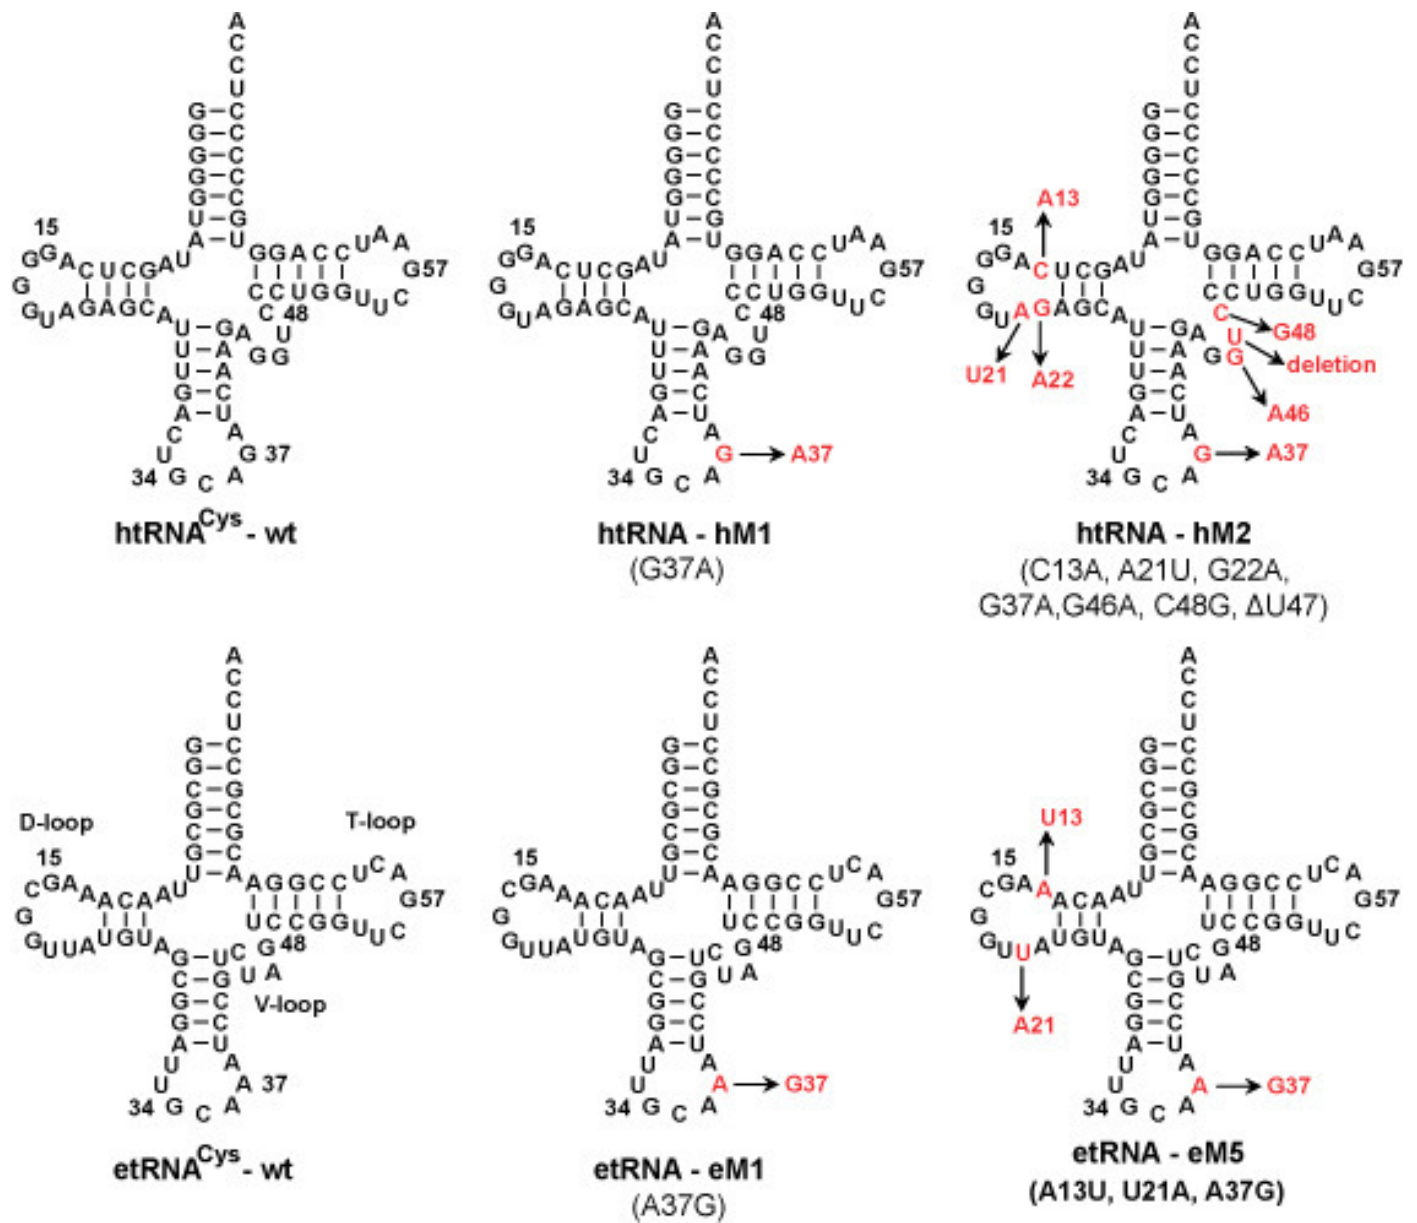

**Supplementary Figure S2. Sequences of tRNA.** Nucleotide sequence of htRNA<sup>Cys</sup> and etRNA<sup>Cys</sup> and their mutants. Nucleotide substitutions are shown in red by arrows.

Supplementary Figure S3 (Hou)

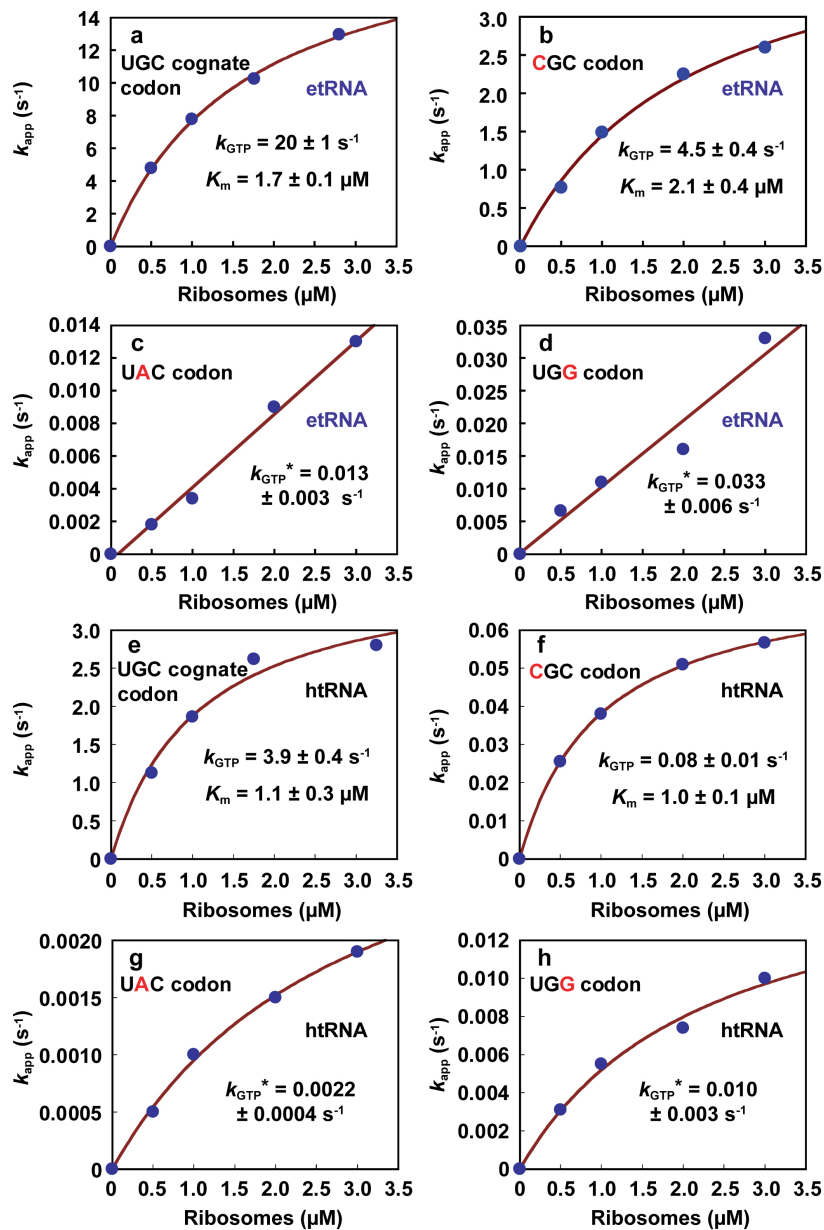

**Supplementary Figure S3. GTPase activity for codon recognition.** (a) Recognition of the cognate UGC codon by etRNA<sup>Cys</sup>; (b) recognition of the 1st-position near-cognate CGC codon by etRNA<sup>Cys</sup>; (c) recognition of the 2nd-position near-cognate UAC codon by etRNA<sup>Cys</sup>; and (d) recognition of the 3rd-position near-cognate UGG codon by etRNA<sup>Cys</sup>, where the site-specific substitutions in near-cognate codons are in red. (e) Recognition of the cognate UGC codon by htRNA<sup>Cys</sup>; (f) recognition of the first-position near-cognate CGC codon by htRNA<sup>Cys</sup>; (g) recognition of the 2nd-position near-cognate UAC codon by htRNA<sup>Cys</sup>; and (h) recognition of the 3rd-position near-cognate UGG codon by htRNA<sup>Cys</sup>, where the site-specific substitutions in near-cognate codons are in red. The error margins of each plot were determined from curve fitting and were 20% or less of the respective experimental value.

Supplementary Figure S4 (Hou)

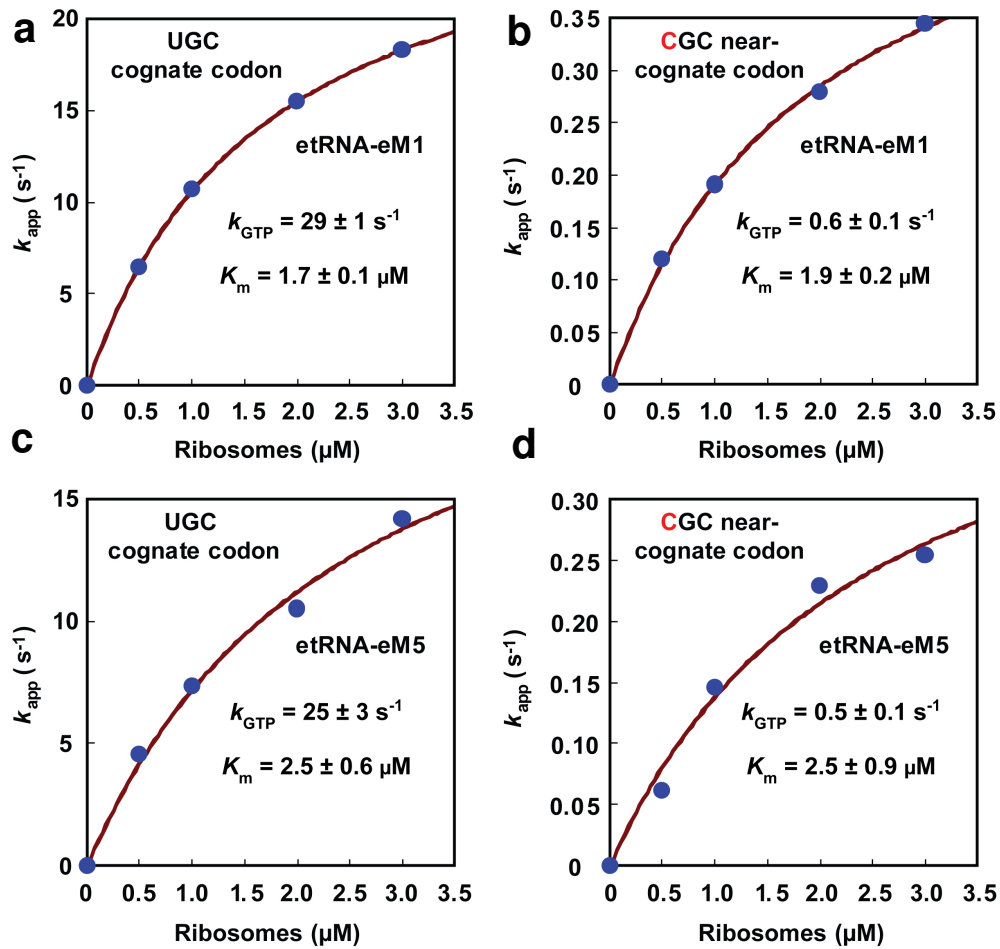

**Supplementary Figure S4. GTPase activity of mutants of etRNA<sup>Cys</sup>.** (a) Recognition of the cognate UGC codon by etRNA<sup>Cys</sup>-eM1; (b) recognition of the near-cognate CGC codon by etRNA<sup>Cys</sup>-eM1; (c) recognition of the cognate UGC codon by etRNA<sup>Cys</sup>-eM5; (d) decognition of the near-cognate CGC codon by etRNA<sup>Cys</sup>-eM5. GTPase activity was plotted as a function of ribosome concentration for codon recognition. The error margins of each plot were determined from curve fitting and were within 20% or less of the respective experimental value.

Supplementary Figure S5 (Hou)

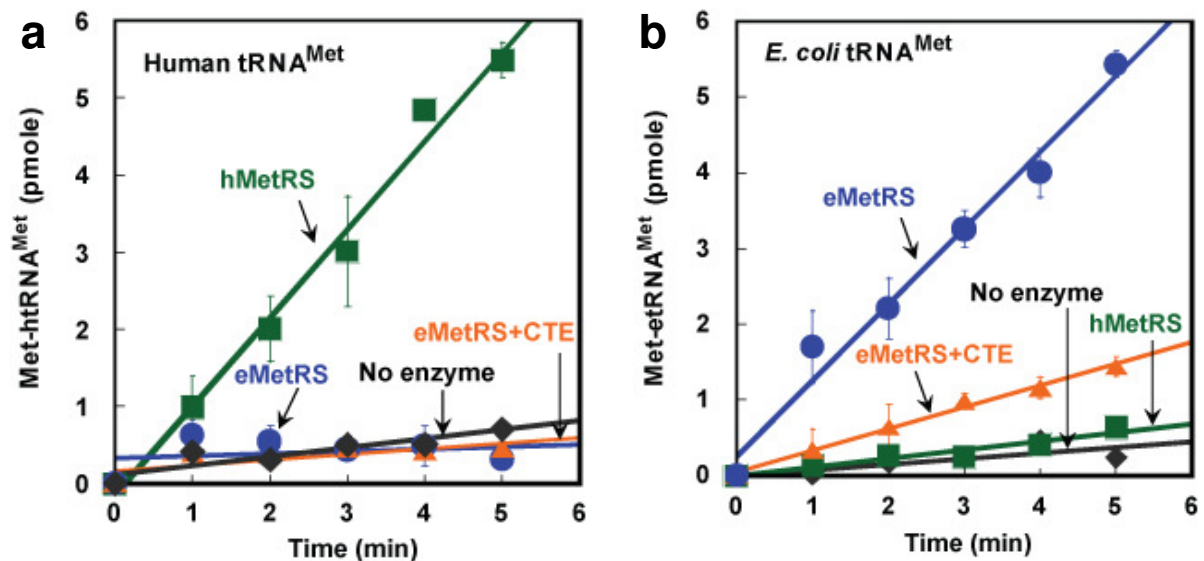

**Supplementary Figure S5. The CTE-fusion to eMetRS.** (a) Time courses of aminoacylation of the transcript of human tRNA<sup>Met</sup> (0.6  $\mu$ M) by eMetRS, hMetRS, and the fusion protein eMetRS+CTE, where the CTE of human CysRS is fused to the C-terminus of eMetRS. The enzyme concentration was 2 nM each. The results show that eMetRS and eMetRS+CTE are unable to cross-acylate the human tRNA, indicating the existence of a cross-species barrier to aminoacylation. (b) Time courses of aminoacylation of the transcript of *E. coli* tRNA<sup>Met</sup> (0.6  $\mu$ M) by eMetRS, hMetRS, and the fusion protein eMetRS+CTE, showing a high activity of eMetRS but interference of this activity by the fusion with the CTE. The enzyme concentration was 1 nM each. In (a), the aminoacylation assay was in a buffer containing 150 mM KCl, 10 mM MgCl<sub>2</sub>, 4 mM DTT, 2 mM ATP, 50 mM HEPES, 20  $\mu$ M <sup>35</sup>S-methionine for eMetRS and eMetRS+CTE fusion protein, whereas in (b), the buffer for human MetRS was the same as above except that the concentration of KCl was reduced to 20 mM. The eMetRS clone was constructed by inserting the *metS* gene into pET22-b, while the human MetRS clone (PET/MHS) was provided by Professor Marc Mirande<sup>47</sup>. Each point in the graphs was the average of three experiments and error bars represented standard deviations.

**Supplementary Table S1. Aminoacylation of tRNA**

| <b>A. Steady-state aminoacylation of tRNA</b>        |              |                         |                                       |                                                         |                                            |
|------------------------------------------------------|--------------|-------------------------|---------------------------------------|---------------------------------------------------------|--------------------------------------------|
| tRNA                                                 | Enzyme       | $K_m$ ( $\mu\text{M}$ ) | $k_{\text{cat}}$ ( $\text{s}^{-1}$ )  | $k_{\text{cat}}/K_m$ ( $\text{s}^{-1} \text{M}^{-1}$ )  | Relative activity to human homologous pair |
| etRNA <sup>Cys</sup>                                 | eCysRS       | $1.0 \pm 0.2$           | $1.0 \pm 0.1$                         | $(1.0 \pm 0.2) \times 10^6$                             |                                            |
| htRNA <sup>Cys</sup>                                 |              | $4.5 \pm 0.7$           | $0.011 \pm 0.003$                     | $(2.4 \pm 0.8) \times 10^3$                             | <b>1/583</b>                               |
| etRNA <sup>Cys</sup>                                 | hCysRS       | $1.0 \pm 0.2$           | $0.62 \pm 0.04$                       | $(6 \pm 1) \times 10^5$                                 |                                            |
| htRNA <sup>Cys</sup>                                 |              | $0.9 \pm 0.1$           | $1.3 \pm 0.1$                         | $(1.4 \pm 0.2) \times 10^6$                             | <b>1</b>                                   |
| etRNA <sup>Cys</sup>                                 | eCysRS + CTE | $0.28 \pm 0.04$         | $0.44 \pm 0.02$                       | $(1.6 \pm 0.2) \times 10^6$                             |                                            |
| htRNA <sup>Cys</sup>                                 |              | $1.4 \pm 0.1$           | $0.07 \pm 0.01$                       | $(5.0 \pm 0.8) \times 10^4$                             | <b>1/28</b>                                |
| <b>B. Single turnover kinetics of aminoacylation</b> |              |                         |                                       |                                                         |                                            |
| tRNA                                                 | Enzyme       | $K_d$ ( $\mu\text{M}$ ) | $k_{\text{chem}}$ ( $\text{s}^{-1}$ ) | $k_{\text{chem}}/K_d$ ( $\text{s}^{-1} \text{M}^{-1}$ ) | Relative activity to human homologous pair |
| etRNA <sup>Cys</sup>                                 | eCysRS       | $3.2 \pm 0.3$           | $15.2 \pm 0.5$                        | $(4.8 \pm 0.5) \times 10^6$                             |                                            |
| htRNA <sup>Cys</sup>                                 |              | $6 \pm 1$               | $0.034 \pm 0.002$                     | $(6 \pm 1) \times 10^3$                                 | <b>1/733</b>                               |
| etRNA <sup>Cys</sup>                                 | hCysRS       | $3.2 \pm 0.5$           | $20 \pm 1$                            | $(6 \pm 1) \times 10^6$                                 |                                            |
| htRNA <sup>Cys</sup>                                 |              | $3.2 \pm 0.5$           | $14 \pm 1$                            | $(4.4 \pm 0.8) \times 10^6$                             | <b>1</b>                                   |
| etRNA <sup>Cys</sup>                                 | eCysRS + CTE | $1.4 \pm 0.1$           | $9.5 \pm 0.4$                         | $(6.8 \pm 0.6) \times 10^6$                             |                                            |
| htRNA <sup>Cys</sup>                                 |              | $1.5 \pm 0.2$           | $0.7 \pm 0.02$                        | $(4.7 \pm 0.6) \times 10^5$                             | <b>1/9.4</b>                               |

Aminoacylation of etRNA<sup>Cys</sup> and htRNA<sup>Cys</sup> by eCysRS, hCysRS, and the fusion protein eCysRS+CTE, showing the existence of a cross-species barrier to aminoacylation of htRNA<sup>Cys</sup> by eCysRS in both steady state and single turnover assays. Each data point is the average of three experiments. Fold difference in activity ( $k_{\text{cat}}/K_m$  or  $k_{\text{chem}}/K_d$ ) is shown in bold face. Error bars represent standard deviations.

**Supplementary Table S2. Steady-state aminoacylation of htRNA<sup>Cys</sup> and etRNA<sup>Cys</sup>**

|       | tRNA       | Enzyme      | $K_m$ ( $\mu\text{M}$ ) | $k_{\text{cat}}$ ( $\text{s}^{-1}$ ) | $k_{\text{cat}}/K_m$ ( $\text{s}^{-1} \text{M}^{-1}$ ) | Relative activity to WT htRNA |
|-------|------------|-------------|-------------------------|--------------------------------------|--------------------------------------------------------|-------------------------------|
| htRNA | WT         | eCysRS      | 4.5±0.7                 | $(1.1\pm0.3)\times10^{-2}$           | $(2.4\pm0.8)\times10^3$                                | 1                             |
|       | U73A       |             |                         |                                      | $(0.12\pm0.02)^b$                                      | 1/(20,000 ± 7,000)            |
|       | G34C       |             | $(64\pm13)^a$           | $(7.5\pm1.5)\times10^{-5}$           | 1.2±0.3                                                | 1/(2,000 ± 800)               |
|       | C48G       |             | 12.8±1.2                | $(2.7\pm0.2)\times10^{-3}$           | $(2.1\pm0.3)\times10^2$                                | 1/(11 ± 4)                    |
|       | G37A (hM1) |             |                         |                                      | $(1.6\pm0.1)^b$                                        | 1/(1,500 ± 500)               |
|       | hM2        |             |                         |                                      | $(1.6\pm0.2)\times10^6$                                |                               |
| etRNA | WT         |             | 1.0±0.2                 | 1.0±0.1                              | $(1.0\pm0.2)\times10^6$                                |                               |
|       | A37G (eM1) |             |                         |                                      | $((1.2\pm0.1)\times10^3)^b$                            |                               |
| htRNA | WT         | hCysRS      | 0.9±0.1                 | 1.3±0.1                              | $(1.4\pm0.2)\times10^6$                                | 1                             |
|       | U73A       |             | 38.2±7.6                | $(3.3\pm0.5)\times10^{-4}$           | 8.6±2.2                                                | 1/(160,000±40,000)            |
|       | G34C       |             | $(172\pm25)^a$          | $(8.7\pm0.5)\times10^{-3}$           | 51±8                                                   | 1/(27,000±5,000)              |
|       | C48G       |             | 13.0±3.0                | 0.14±0.02                            | $(1.1\pm0.3)\times10^4$                                | 1/(127±36)                    |
|       | G37A (hM1) |             |                         |                                      | $(5.9\pm0.7)^b$                                        | 1/(240,000±30,000)            |
|       | hM2        |             |                         |                                      | $(0.4\pm0.1)\times10^6$                                |                               |
| etRNA | WT         |             | 1.0±0.2                 | 0.62±0.04                            | $(6\pm1)\times10^5$                                    |                               |
|       | A37G (eM1) |             |                         |                                      | $((1.1\pm0.1)\times10^3)^b$                            |                               |
| htRNA | WT         | eCysRS +CTE | 1.4±0.1                 | 0.07±0.01                            | $(5.0\pm0.8)\times10^4$                                | 1                             |
|       | U73A       |             |                         |                                      | $(0.69\pm0.10)^b$                                      | 1/(72,000±16,000)             |
|       | G34C       |             | 19.2±1.0                | $(3.3\pm0.2)\times10^{-4}$           | 17±1                                                   | 1/(2,900 ± 500)               |
|       | C48G       |             | 10.5±1.2                | $(6.2\pm0.8)\times10^{-3}$           | $(5.9\pm1.0)\times10^2$                                | 1/(85 ± 20)                   |
|       | G37A (hM1) |             |                         |                                      | $(0.39\pm0.07)^b$                                      | 1/(130,000 ± 30,000)          |
|       | hM2        |             |                         |                                      | $(0.5\pm0.1)\times10^6$                                |                               |
| etRNA | WT         |             | 0.28±0.04               | 0.44±0.02                            | $(1.6\pm0.2)\times10^6$                                |                               |
|       | A37G (eM1) |             |                         |                                      | $((2.8\pm0.4)\times10^3)^b$                            |                               |

a. Estimated values from curve fitting; b. Estimated from the initial rate of aminoacylation under sub- $K_m$  concentration of the substrate. Each data point is the average of 3 experiments. Error bars represent standard deviations.



**Supplementary Table S3. The specificity factor  $k_{\text{cat}}/K_m$  ( $\text{M}^{-1}\text{s}^{-1}$ ) of aminoacylation.**

|           | 15-48                        | 37 | hCysRS                      | eCysRS+CTE                  | eCysRS                      | Ref    |
|-----------|------------------------------|----|-----------------------------|-----------------------------|-----------------------------|--------|
| htRNA-wt  | G-C                          | G  | $(2.6 \pm 0.3) \times 10^6$ | $(5.0 \pm 0.8) \times 10^4$ | $(2.4 \pm 0.8) \times 10^3$ | Tab S1 |
| htRNA-hM1 | G-C                          | A  | $5.9 \pm 0.7$               | $0.4 \pm 0.1$               | $1.6 \pm 0.1$               | Tab S2 |
| htRNA-hM2 | G-G<br>+ others <sup>a</sup> | A  | $(0.4 \pm 0.1) \times 10^6$ | $(0.5 \pm 0.1) \times 10^6$ | $(1.6 \pm 0.2) \times 10^6$ | Tab S2 |
| etRNA-wt  | G-G                          | A  | $(0.6 \pm 0.1) \times 10^6$ | $(1.6 \pm 0.2) \times 10^6$ | $(1.0 \pm 0.2) \times 10^6$ | Tab S2 |
| etRNA-eM1 | G-G                          | G  | $(1.1 \pm 0.1) \times 10^3$ | $(2.8 \pm 0.4) \times 10^3$ | $(1.2 \pm 0.1) \times 10^3$ | Tab S2 |

<sup>a</sup>The core mutations in the hM2 mutant of htRNA<sup>Cys</sup> contains the G15-G48 base pair and others<sup>8</sup>, including A13-A22-A46, U21, and deletion of U47. Abbreviations: wt: wild-type; Tab: Table. The data showed that hCysRS discriminates the G37A mutation by nearly  $10^6$ -fold (see values of htRNA-wt *versus* htRNA-hM1 in red boxes), whereas eCysRS discriminates the A37G mutation by only  $10^3$ -fold (see values of etRNA-wt *versus* etRNA-eM1 in red boxes).

**Supplementary Table S4. Single nucleotide substitution on tRNA selectivity on the ribosome.**

| Lab                     | tRNA                              | Cognate codon*          |                                      |                                                          | Near-cognate codon*     |                                      |                                                          | Selectivity | Selectivity relative to wt tRNA |
|-------------------------|-----------------------------------|-------------------------|--------------------------------------|----------------------------------------------------------|-------------------------|--------------------------------------|----------------------------------------------------------|-------------|---------------------------------|
|                         |                                   | $K_m$ ( $\mu\text{M}$ ) | $k_{\text{GTP}}$ ( $\text{s}^{-1}$ ) | $k_{\text{GTP}}/K_m$ ( $\mu\text{M}^{-1}\text{s}^{-1}$ ) | $K_m$ ( $\mu\text{M}$ ) | $k_{\text{GTP}}$ ( $\text{s}^{-1}$ ) | $k_{\text{GTP}}/K_m$ ( $\mu\text{M}^{-1}\text{s}^{-1}$ ) |             |                                 |
| Hou (this work)         | Wt-etRNA <sup>Cys</sup> (A37)     | 1.7                     | 20                                   | 12                                                       | 2.1                     | 4.5                                  | 2.1                                                      | 5.7         | 1                               |
|                         | eM1etRNA <sup>Cys</sup> (G37)     | 1.7                     | 29                                   | 17                                                       | 1.9                     | 0.6                                  | 0.3                                                      | 57          | 10                              |
| Uhlenbeck <sup>32</sup> | Wt tRNA <sup>Ala</sup> (A32-U38)  | 4.5                     | 31                                   | 6.9                                                      | 4.6                     | 2.4                                  | 0.52                                                     | 13          | 1                               |
|                         | Mut tRNA <sup>Ala</sup> (U32-A38) | 2.9                     | 27                                   | 9.3                                                      | 4.9                     | 26                                   | 5.3                                                      | 1.8         | 1/7.2                           |
| Green <sup>34</sup>     | Wt tRNA <sup>Trp</sup> (U11-G24)  | 5.6                     | 80                                   | 14                                                       | 3.0                     | 5.6                                  | 1.9                                                      | 7.6         | 1                               |
|                         | Mut tRNA <sup>Trp</sup> (U11-A24) | 8.5                     | 81                                   | 9.6                                                      | 9.8                     | 45                                   | 4.6                                                      | 2.1         | 1/3.6                           |

The values  $K_m$ 's were estimated from published hyperbolic fits of  $k_{\text{app}}$  versus ribosome concentration, whereas  $k_{\text{GTP}}$ 's are the reported values. In this work, the cognate and near-cognate codons are UGC and CGC, respectively. In the Uhlenbeck work, the cognate and near-cognate codons are GCC and GCA, respectively. In the Green work, the cognate and near-cognate codons are UGG and UGA, respectively.

Selectivity =  $[k_{\text{GTP}}/K_m]_{(\text{Cognate})}/[k_{\text{GTP}}/K_m]_{(\text{Near-cognate})}$ .

Supplementary Table S5. Anticodon loop sequences of etRNA and htRNA.

| tRNA | Anticodon<br>5' NNN 3' |       | <i>E. coli</i> |     | Human |     |     |     |
|------|------------------------|-------|----------------|-----|-------|-----|-----|-----|
|      | <i>E. coli</i>         | Human | A37            | G37 | A37   | G37 | U37 | C37 |
| Ala  | GGC                    |       | 2              |     |       |     |     |     |
|      | UGC                    | UGC   | 3              |     | 12    |     |     |     |
|      |                        | AGC   |                |     | 32    |     |     |     |
|      |                        | CGC   |                |     | 5     |     |     |     |
| Arg  | ACG                    | ACG   | 4              |     |       | 8   |     |     |
|      | CCG                    | CCG   |                | 1   |       | 4   |     |     |
|      |                        | UCG   |                |     |       | 7   |     |     |
|      | CCU                    | CCU   | 1              |     | 8     | 2   |     |     |
|      | UCU                    | UCU   | 1              |     | 6     |     |     |     |
| Asn  | GUU                    | GUU   | 4              |     | 39    |     |     |     |
|      |                        | AUU   |                |     | 2     |     |     |     |
| Asp  | GUC                    | GUC   | 3              |     | 20    |     |     |     |
| Cys  | GCA                    | GCA   | 1              |     |       | 31  |     |     |
| Gln  | CUG                    | CUG   | 2              |     | 24    | 3   |     |     |
|      | UUG                    | UUG   | 2              |     | 14    | 16  |     |     |
| Glu  | UUC                    | UUC   | 4              |     | 20    | 1   |     |     |
|      |                        | CUC   |                |     | 24    | 1   |     |     |
| Gly  | GCC                    | GCC   | 4              |     | 17    |     |     |     |
|      | CCC                    | CCC   | 1              |     | 12    |     |     |     |
|      | UCC                    | UCC   | 1              |     | 12    |     |     |     |
| His  | GUG                    | GUG   | 1              |     |       | 12  |     |     |
| Ile  |                        | AAU   |                |     | 16    | 1   |     |     |
|      | GAU                    | GAU   | 3              |     | 3     |     |     |     |
|      |                        | UAU   |                |     | 5     |     |     |     |
| Leu  |                        | AAG   |                |     | 2     | 11  | 1   |     |
|      | CAG                    | CAG   |                | 4   | 1     | 9   |     |     |
|      | UAG                    | UAG   |                | 1   |       | 5   |     |     |
|      | CAA                    | CAA   | 1              |     | 5     | 2   |     |     |
|      |                        | CUA   |                |     | 1     |     |     |     |
|      | UAA                    | UAA   | 1              |     | 4     | 7   |     | 1   |
|      | GAG                    |       |                | 1   |       |     |     |     |
| Lys  |                        | CUU   |                |     | 21    |     |     | 1   |
|      | UUU                    | UUU   | 6              |     | 21    |     |     | 1   |
| Met  | CAU                    | CAU   | 8              |     | 25    |     |     |     |
| Phe  | GAA                    | GAA   | 2              |     | 2     | 16  |     |     |
| Pro  |                        | AGG   |                |     | 1     | 13  |     |     |
|      | GGG                    | GGG   |                | 1   |       | 1   |     |     |
|      | CGG                    | CGG   |                | 1   |       | 4   |     |     |
|      | UGG                    | UGG   |                | 1   | 2     | 9   |     |     |
|      |                        |       | A37            | G37 | A37   | G37 | U37 | C37 |
| tRNA | Anticodon<br>5' NNN 3' |       | <i>E. coli</i> |     | Human |     |     |     |
| Sec  | UCA                    | UCA   | 1              |     | 3     | 1   |     |     |
| Ser  |                        | AGA   |                |     | 12    | 2   |     |     |

|                                                                                                                                                           |     |     |                |       |       |       |      |     |
|-----------------------------------------------------------------------------------------------------------------------------------------------------------|-----|-----|----------------|-------|-------|-------|------|-----|
|                                                                                                                                                           | CGA | CGA | 1              |       | 5     |       |      |     |
|                                                                                                                                                           | UGA | UGA | 1              |       | 10    |       |      |     |
|                                                                                                                                                           |     | ACU |                |       | 1     |       |      |     |
|                                                                                                                                                           | GCU | GCU | 1              |       | 8     |       |      |     |
|                                                                                                                                                           | GGA |     | 2              |       |       |       |      |     |
| Thr                                                                                                                                                       |     | AGU |                |       | 11    |       |      |     |
|                                                                                                                                                           | CGU | CGU | 2              |       | 6     |       |      |     |
|                                                                                                                                                           | UGU | UGU | 1              |       | 8     |       |      |     |
|                                                                                                                                                           | GGU |     | 2              |       |       |       |      |     |
| Trp                                                                                                                                                       | CCA | CCA | 1              |       | 8     |       | 1    |     |
| Tyr                                                                                                                                                       | GUA | GUA | 3              |       | 1     | 19    |      |     |
|                                                                                                                                                           |     | AUA |                |       |       | 1     |      |     |
| Val                                                                                                                                                       | GAC |     | 2              |       |       |       |      |     |
|                                                                                                                                                           | UAC | UAC | 5              |       | 6     |       |      |     |
|                                                                                                                                                           |     | AAC |                |       | 15    |       |      |     |
|                                                                                                                                                           |     | CAC |                |       | 23    |       |      |     |
| sum                                                                                                                                                       |     |     | 75             | 10    | 465   | 194   | 1    | 4   |
| %<br>use                                                                                                                                                  |     |     | 88.24          | 11.76 | 70.03 | 29.22 | 0.15 | 0.6 |
|                                                                                                                                                           |     |     | A37            | G37   | A37   | G37   | U37  | C37 |
|                                                                                                                                                           |     |     | <i>E. coli</i> |       | Human |       |      |     |
| Numbers represent copy numbers of tRNAs based on genomic tRNA database ( <a href="http://lowelab.ucsc.edu/GtRNAdb">http://lowelab.ucsc.edu/GtRNAdb</a> ). |     |     |                |       |       |       |      |     |

Sequence analysis was based on the genomic tRNA database (<http://lowelab.ucsc.edu/GtRNAdb>). The sum refers to the total number of tRNA genes in *E. coli* or in humans that contain A37, G37, C37, or U37. For example, the total number of tRNA genes in *E. coli* with A37 is 75, while the total number of tRNA genes with G37 is 10. Thus, the frequency of A37 among the total number of tRNA genes in *E. coli* is 88.24 % (= (75)/(75 + 10)).

Supplementary Table S6. Anticodon loop sequences of yeast and human mitochondrial tRNAs.

| tRNA         | Anticodon<br>5' NNN 3' |            | Yeast<br>mitochondria         |              | Human<br>mitochondria         |              |
|--------------|------------------------|------------|-------------------------------|--------------|-------------------------------|--------------|
|              | yeast                  | Human      | A37                           | G37          | A37                           | G37          |
| Ala          | UGC                    | UGC        | 2                             |              | 1                             | 1            |
| Arg          | ACG                    |            | 1                             |              |                               |              |
|              | UCU                    | UCG        |                               |              | 1                             | 1            |
| Asn          | GUU                    | GUU        | 1                             |              | 2                             |              |
| Asp          | GUC                    | GUC        | 1                             |              | 1                             |              |
| <b>Cys</b>   | <b>GCA</b>             | <b>GCA</b> | <b>1 (A)</b>                  |              | <b>1 (A)</b>                  |              |
| Gln          | UUG                    | UUG        | 1                             |              |                               | 2            |
| Glu          | UUC                    | UUC        | 1                             |              | 1                             |              |
| Gly          | UCC                    | UCC        | 1                             |              | 1                             |              |
| His          | GUG                    | GUG        |                               | 1            | 1                             |              |
| Ile          | GAU                    | GAU        | 1                             |              | 1                             |              |
| Leu          |                        | UAG        |                               |              |                               | 1            |
|              | UAA                    | UAA        |                               | 1            | 1                             |              |
| Lys          | UUU                    | UUU        | 1                             |              | 1                             |              |
| Met          | CAU                    | CAU        | 1                             | 1            | 2                             |              |
| Phe          | GAA                    | GAA        |                               | 1            | 1                             |              |
| Pro          | UGG                    | UGG        |                               | 1            |                               | 1            |
| Ser          | UGA                    | UGA        |                               | 1            | 1                             |              |
|              | GCU                    | GCU        | 1                             |              | 1                             |              |
| Thr          | UAG                    |            |                               | 1            |                               |              |
|              | UGU                    | UGU        | 1                             |              | 1                             |              |
| Trp          | UCA                    | UCA        | 1                             |              | 1                             |              |
| Tyr          | GUA                    | GUA        | 2                             |              | 1                             |              |
| Val          | UAC                    | UAC        | 2                             |              | 1                             |              |
| sum          |                        |            | 20                            | 7            | 21                            | 6            |
| <b>Usage</b> |                        |            | <b>20/27</b>                  | <b>7/27</b>  | <b>21/27</b>                  | <b>6/27</b>  |
| <b>% use</b> |                        |            | <b>74.07</b>                  | <b>25.93</b> | <b>77.78</b>                  | <b>22.22</b> |
|              |                        |            | <b>A37</b>                    | <b>G37</b>   | <b>A37</b>                    | <b>G37</b>   |
|              |                        |            | <b>Yeast<br/>mitochondria</b> |              | <b>Human<br/>mitochondria</b> |              |

Values represent the number of each tRNA gene. Sequence analysis was based on the transfer RNA database (<http://trnadb.bioinf.uni-leipzig.de>)

The sum refers to the total number of tRNA genes in yeast mitochondria or in human mitochondria that contain A37 or G37. Note that mitochondria do not encode C37 or U37 in tRNA genes. Based on the analysis, for example, the total number of tRNA genes in yeast mitochondria with A37 is 20, while that with G37 is 7. Thus, the frequency of A37 among the total number of tRNA genes in yeast mitochondria is 74.07 % ( $= (20)/(20 + 7)$ ).

### **Supplementary Reference**

47. Kaminska, M., Shalak, V. & Mirande, M. The appended C-domain of human methionyl-tRNA synthetase has a tRNA-sequestering function. *Biochemistry* **40**, 14309-16 (2001).
